# Supplementary material for: Loss of hepatic Mboat7 leads to liver fibrosis
Source: PubMed Central journal article supplement — Gut. 2020 Jun 26;70(5):940–50. doi: 10.1136/gutjnl-2020-320853 (PMC8040158; doi:10.1136/gutjnl-2020-320853), 2020-06-26
Supplement: gutjnl-2020-320853supp006.pdf [file gutjnl-2020-320853supp006.pdf]

**Supplementary Table 4 -Differentially regulated gene in Mboat7 $\Delta$ hep mice at steady state**

| Transcript Gene Symbol | logFC            | FDR             |
|------------------------|------------------|-----------------|
| Cidec                  | -2.208650537     | 0.000175969     |
| Gm47528                | -2.15E+00        | 7.33E-06        |
| Gm10680                | -2.06E+00        | 7.17E-06        |
| Apoa4                  | -2.05E+00        | 3.57E-06        |
| 1810046K07Rik          | -2.040695303     | 0.000358886     |
| Cgref1                 | -1.99E+00        | 2.65E-05        |
| Cntnap1                | -1.891015048     | 0.000156537     |
| Aqp4                   | -1.811152009     | 0.001910055     |
| Gm38832                | -1.725698346     | 0.028934642     |
| Ptgds                  | -1.55E+00        | 6.48E-05        |
| B930025P03Rik          | -1.336666553     | 0.015157741     |
| Them7                  | -1.211146201     | 0.001373252     |
| Gm11752                | -1.201816477     | 0.048941387     |
| Fabp2                  | -1.08E+00        | 3.70E-07        |
| Adh6-ps1               | -1.06166898      | 0.00564718      |
| 2010003K11Rik          | -1.058031718     | 0.017198774     |
| Fbxo36                 | -1.037201697     | 0.002564689     |
| Lamb3                  | -1.026985363     | 0.010506306     |
| Wnt5b                  | -1.020532907     | 0.024445085     |
| Elovl3                 | -1.008547488     | 0.007835016     |
| B3galt1                | -1.006584812     | 0.017783168     |
| Dntt                   | -0.999955089     | 0.021942461     |
| 3930402G23Rik          | -0.981091132     | 0.039200109     |
| Pgm3                   | -0.957873456     | 0.000362975     |
| Mppe1                  | -0.948886391     | 0.00049657      |
| Fam47e                 | -0.917550626     | 0.037960814     |
| Pctp                   | -0.916355787     | 0.000358886     |
| Gm49668                | -0.880390414     | 0.043134075     |
| Slc6a16                | -0.850599152     | 0.022131631     |
| Bhlhb9                 | -0.847389918     | 0.008958549     |
| Gm43672                | -0.804516158     | 0.027257657     |
| Trim14                 | -0.79817618      | 0.015065984     |
| Arsg                   | -0.786782438     | 0.002732294     |
| 4930412C18Rik          | -0.776872444     | 0.01684311      |
| Gm38345                | -0.772763341     | 0.042911363     |
| Spns2                  | -0.763247411     | 0.017783168     |
| Cdcp1                  | -0.759699135     | 0.034041395     |
| Ccnd1                  | -0.749542129     | 0.0196137       |
| AC132455.2             | -0.74346771      | 0.007835016     |
| 1810010H24Rik          | -0.730368377     | 0.025598338     |
| Fyb2                   | -0.723065824     | 0.038555691     |
| <b>Mboat7</b>          | <b>-7.10E-01</b> | <b>1.10E-08</b> |
| Chrna2                 | -0.680804213     | 0.028604115     |
| Elovl5                 | -0.672789516     | 0.010880767     |
| Mettl1                 | -0.639042949     | 0.007835016     |
| Lgals8                 | -0.635174103     | 0.003720187     |
| Mpzi2                  | -0.633001639     | 0.007119686     |
| Ehhadh                 | -0.632276997     | 0.003717218     |
| Nlrp12                 | -0.611403205     | 0.042370374     |
| Tmem62                 | -0.605987289     | 0.011922639     |
| Crybg1                 | -0.602076987     | 0.022522914     |
| Sulf2                  | -0.593142852     | 0.018005418     |

|               |              |             |
|---------------|--------------|-------------|
| Pnpla7        | -0.575191378 | 0.005139302 |
| Yif1a         | -0.559806061 | 0.009772907 |
| Prox1os       | -0.555958303 | 0.04856971  |
| S100a10       | -0.547415199 | 0.009772907 |
| Inca1         | -0.538498704 | 0.014897764 |
| Gstt2         | -0.533509616 | 0.010880767 |
| Cpt1a         | -0.520780892 | 0.015210686 |
| Tmem120a      | -0.513846134 | 0.021897739 |
| Ftcd          | -0.477164399 | 0.040205732 |
| Ppa1          | -0.469880985 | 0.002605565 |
| Hykk          | -0.469690369 | 0.021764907 |
| Bhmt2         | -0.464011766 | 0.01226232  |
| Pcx           | -0.464001381 | 0.04856971  |
| Etfrf1        | -0.458974444 | 0.037589634 |
| Acox1         | -0.451304986 | 0.01226232  |
| Smim19        | -0.450982625 | 0.041948682 |
| Acaa1a        | -0.447716135 | 0.015210686 |
| Cyp4a14       | -0.442779034 | 0.026227113 |
| Mfsd4b1       | -0.44082965  | 0.01350056  |
| Nup210        | -0.439320878 | 0.040205732 |
| Gstm4         | -0.430223702 | 0.021156577 |
| Zc3h7b        | -0.425859393 | 0.030959557 |
| Ppp1r7        | -0.422440761 | 0.01684311  |
| Decr2         | -0.42088904  | 0.037589634 |
| Fgf1          | -0.40819765  | 0.025297114 |
| Def8          | -0.407463771 | 0.045069913 |
| Plbd1         | -0.402975881 | 0.034434981 |
| Pex16         | -0.400851376 | 0.017198774 |
| C1rl          | -0.399266674 | 0.024482696 |
| Acsf3         | -0.397715725 | 0.030426782 |
| Stard5        | -0.380387593 | 0.023555572 |
| Cpox          | -0.371188665 | 0.041492429 |
| Krcc1         | -0.359696002 | 0.047018206 |
| Tmem135       | -0.352842341 | 0.035491948 |
| Scrn2         | -0.341392981 | 0.048941387 |
| Dpp3          | -0.337443904 | 0.041948682 |
| Cebpg         | 0.32826517   | 0.047018206 |
| Pde8a         | 0.364229507  | 0.042911363 |
| Rnf19b        | 0.364830404  | 0.042911363 |
| Itpr2         | 0.388521265  | 0.022522914 |
| Tesk1         | 0.390206574  | 0.040971624 |
| 4930402H24Rik | 0.397856956  | 0.03956777  |
| Arhgdia       | 0.426953318  | 0.007128832 |
| Rai14         | 0.428403636  | 0.028604115 |
| Igip          | 0.428464104  | 0.02089335  |
| Vps13a        | 0.44026849   | 0.043494805 |
| Hdac5         | 0.450943767  | 0.027257657 |
| Gm2a          | 0.453605711  | 0.017198774 |
| Tfdp2         | 0.45941233   | 0.033801058 |
| Yaf2          | 0.468657657  | 0.021764907 |
| Bin1          | 0.473051623  | 0.042911363 |
| Nrn1          | 0.480665918  | 0.022522914 |
| Rnf145        | 0.481120945  | 0.000241291 |
| Zbtb1         | 0.494048855  | 0.033816761 |

|               |             |             |
|---------------|-------------|-------------|
| Coq10a        | 0.494378149 | 0.007024313 |
| Plekha1       | 0.500076958 | 0.022865403 |
| Tmem150a      | 0.508537675 | 0.027679244 |
| Cyb5r3        | 0.512479451 | 0.022414777 |
| Tmem131l      | 0.516918338 | 0.04856971  |
| Tent5a        | 0.526624104 | 0.020542484 |
| Ugdh          | 0.528705502 | 0.010159616 |
| Nqo2          | 0.540790542 | 0.005268873 |
| Cry1          | 0.542188647 | 0.042911363 |
| Slc17a8       | 0.543757425 | 0.026277074 |
| 9030616G12Rik | 0.547827582 | 0.049239086 |
| Plekhg5       | 0.548330206 | 0.019174832 |
| Orai1         | 0.553090336 | 0.028009816 |
| Akr1c14       | 0.557940684 | 0.038570648 |
| Agfg2         | 0.566095423 | 0.028047289 |
| Samd1         | 0.574886492 | 0.028009816 |
| Ugt2b1        | 0.589244148 | 0.004129425 |
| Cyp2c29       | 0.602162868 | 0.009512325 |
| Adamtsl4      | 0.602842686 | 0.020413264 |
| Pogk          | 0.627013264 | 0.016856598 |
| Cnnm4         | 0.637128133 | 0.005964683 |
| mt-Ti         | 0.659279467 | 0.028009816 |
| Kmt5a         | 0.671682962 | 0.000136392 |
| Rbm38         | 0.681863632 | 0.030697693 |
| Gclc          | 0.687342791 | 0.021146957 |
| Angptl3       | 0.688263743 | 0.001694739 |
| Gabbr1        | 0.693668296 | 0.021666114 |
| Pisd-ps1      | 0.724290997 | 0.027257657 |
| Cyp4f14       | 0.73698638  | 0.001180485 |
| Scd1          | 0.767281388 | 0.005444135 |
| F830016B08Rik | 0.768380766 | 0.027679244 |
| Dbf4          | 0.783481295 | 0.042799473 |
| Rabep2        | 0.788427113 | 0.001008036 |
| Tuba8         | 0.796577765 | 0.007556274 |
| Hspa2         | 0.806082651 | 0.014459723 |
| Pltp          | 0.825054951 | 0.000179127 |
| Gpr135        | 0.830272538 | 0.028009816 |
| Coprs         | 0.835575795 | 0.027257657 |
| Cyp2a4        | 0.849987805 | 0.007062169 |
| Vegfb         | 0.852381027 | 0.001599334 |
| Wdr91         | 0.856507126 | 0.000358886 |
| Sacs          | 0.873195399 | 0.017393035 |
| Tspan17       | 0.87855343  | 0.027257657 |
| Lor           | 0.879764105 | 0.019808918 |
| Gm6135        | 0.882989303 | 0.036156146 |
| Adam11        | 0.899627525 | 0.027215516 |
| Sult1c2       | 0.900211081 | 0.040971624 |
| Plekhf1       | 0.901054486 | 0.005139302 |
| Serpina6      | 0.932781563 | 0.026277074 |
| Lrrc14b       | 0.938304562 | 0.034748571 |
| Jun           | 0.98465279  | 0.001599334 |
| Gm48878       | 0.988042001 | 0.049336193 |
| Adgrv1        | 1.018061966 | 0.047018206 |
| Gm8941        | 1.047325556 | 0.049336193 |

|               |             |             |
|---------------|-------------|-------------|
| Adrb3         | 1.055251885 | 0.007666337 |
| Cyp2c70       | 1.06E+00    | 3.57E-06    |
| Gm14057       | 1.08012515  | 0.017783168 |
| Lrp2bp        | 1.087751957 | 0.028047289 |
| Serpina7      | 1.11336478  | 0.011530719 |
| Hells         | 1.118530869 | 0.010281745 |
| Gdf15         | 1.127252167 | 0.010880767 |
| Gstm3         | 1.193744413 | 0.007666337 |
| Slc13a2       | 1.213599825 | 0.037245096 |
| C730036E19Rik | 1.218213157 | 0.04517402  |
| Gm10804       | 1.388617852 | 0.021764907 |
| Myom1         | 1.412202892 | 0.041948682 |
| Ncaph         | 1.471110623 | 0.010880767 |
| Jph1          | 1.512173459 | 0.027257657 |
| Hamp2         | 1.599190037 | 0.018828535 |
| Cyp2c55       | 1.601265013 | 0.027215516 |
| Mtfr2         | 1.606515255 | 0.027679244 |
| Lrrc39        | 1.846780701 | 0.005585269 |
| Gm8251        | 1.953427282 | 0.015210686 |
| Gm11967       | 1.968092732 | 0.001599334 |
| Gck           | 1.999087307 | 0.001414009 |
| Slc25a4       | 2.160977257 | 0.04517402  |
| Pygm          | 2.952638969 | 0.039856931 |
| Slc2a4        | 3.308180208 | 0.01937891  |
| Srl           | 3.649896856 | 0.020542484 |
| Obscn         | 4.784753773 | 0.011530719 |
