# Supplementary material for: Loss of hepatic Mboat7 leads to liver fibrosis
Source: PubMed Central journal article supplement — Gut. 2020 Jun 26;70(5):940–50. doi: 10.1136/gutjnl-2020-320853 (PMC8040158; doi:10.1136/gutjnl-2020-320853), 2020-06-26
Supplement: gutjnl-2020-320853supp008.pdf [file gutjnl-2020-320853supp008.pdf]

**Supplementary Table 5 -Differentially regulated gene in Mboat7 $\Delta$ hep mice under HFCDD**

| Transcript Gene Symbol | logFC               | FDR             |
|------------------------|---------------------|-----------------|
| Mup17                  | -2.756659338        | 0.0000195       |
| AC121973.1             | -2.701352324        | 0.00000183      |
| Mup18                  | -2.306799519        | 0.00087669      |
| Slco1a1                | -2.222460797        | 0.0102315       |
| Meg3                   | -2.103059426        | 0.0000169       |
| Elovl3                 | -2.043221455        | 6.97E-09        |
| Gm13775                | -1.916691384        | 0.00000495      |
| Rian                   | -1.592075034        | 0.04656355      |
| Gm15441                | -1.585920466        | 0.01937814      |
| Sult2a7                | -1.48077563         | 0.01240162      |
| Disp2                  | -1.450611594        | 0.00079669      |
| Sult2a8                | -1.3344226          | 5.83E-09        |
| Ugt2b37                | -1.25867302         | 0.02366938      |
| Gm12265                | -1.235621458        | 0.04753785      |
| Ctcflos                | -1.210492555        | 0.0000675       |
| Mup3                   | -1.172368123        | 0.00322289      |
| 1810053B23Rik          | -1.170238447        | 0.0000639       |
| Cntnap1                | -1.161675961        | 0.0000283       |
| Gm32063                | -1.116739696        | 0.00907009      |
| Mup-ps13               | -1.102033766        | 0.04380487      |
| Fgf21                  | -1.081219328        | 0.00371583      |
| Fpr1                   | -1.044543998        | 0.00714816      |
| Gm36028                | -1.029125743        | 0.02788057      |
| Asb2                   | -1.01560388         | 0.02749747      |
| Cyp2d38-ps             | -0.997678003        | 0.01198356      |
| Slc6a16                | -0.984973351        | 0.01201165      |
| Tbx3os1                | -0.949420695        | 0.04846489      |
| Aqp4                   | -0.916271918        | 0.0000168       |
| <b>Mboat7</b>          | <b>-0.874023019</b> | <b>5.25E-10</b> |
| Serpina12              | -0.867921312        | 0.00089108      |
| Tsku                   | -0.859143119        | 0.01142015      |
| Cyp2d37-ps             | -0.854844357        | 0.00073401      |
| Siglece                | -0.852020809        | 0.04459267      |
| Ces3b                  | -0.820517207        | 0.00040814      |
| Cd163                  | -0.816616222        | 0.02749977      |
| Pck1                   | -0.803314205        | 0.00737405      |
| Gm17753                | -0.763097975        | 0.0080091       |
| Angptl6                | -0.747552914        | 0.0006444       |
| Gpc1                   | -0.731760424        | 0.00090476      |
| Cyp2b13                | -0.728801525        | 0.00377369      |
| Cd300e                 | -0.725855791        | 0.04010412      |
| Ces3a                  | -0.724127348        | 0.00942936      |
| Colec10                | -0.711620914        | 0.0000547       |
| Angptl4                | -0.709253185        | 0.0000185       |
| Mcm10                  | -0.70457694         | 0.00194045      |
| Ifit1                  | -0.684484373        | 0.0080091       |
| Neat1                  | -0.67876151         | 0.00945751      |
| Nlrp12                 | -0.667545423        | 0.00018577      |
| H2-T24                 | -0.657128708        | 0.03927235      |
| Tedc2                  | -0.655881398        | 0.0000703       |
| Slc25a22               | -0.653378266        | 0.00018622      |
| Lama1                  | -0.65018018         | 0.04691612      |
| Inhbc                  | -0.649868996        | 0.00015823      |
| Lrtm1                  | -0.641688673        | 0.01097286      |
| 4930480G23Rik          | -0.633910337        | 0.02652607      |
| Tmem25                 | -0.622278912        | 0.00992245      |
| Slc22a5                | -0.619852636        | 0.00330088      |

|               |              |            |
|---------------|--------------|------------|
| Fitm1         | -0.612516281 | 0.04525693 |
| Saa3          | -0.610075944 | 0.00015182 |
| Ugt3a1        | -0.606767323 | 0.00627877 |
| AC157910.3    | -0.604883237 | 0.01937748 |
| Rapgef4       | -0.60259691  | 0.00069122 |
| Saa1          | -0.599287329 | 0.0090477  |
| Pex11a        | -0.596456958 | 0.00923531 |
| Bhmt          | -0.59444879  | 0.00362938 |
| Mgll          | -0.58714902  | 0.00411524 |
| Cyp2d40       | -0.575561817 | 0.03172303 |
| Ifit3         | -0.571257854 | 0.01809341 |
| Cyp4b1        | -0.566951253 | 0.00062933 |
| Rsad2         | -0.557088529 | 0.00940481 |
| Fam169b       | -0.552876996 | 0.00395314 |
| C730027H18Rik | -0.551008643 | 0.01223138 |
| Hopx          | -0.549907502 | 0.0000469  |
| Lgals4        | -0.548367012 | 0.04720158 |
| Amigo2        | -0.541629312 | 0.04097577 |
| Siglec1       | -0.536695866 | 0.04012194 |
| Cyp2f2        | -0.532071173 | 0.00062414 |
| Acnat2        | -0.529086947 | 0.01416004 |
| Tnfaip8l1     | -0.527167847 | 0.0025461  |
| Paqr9         | -0.515891316 | 0.00869158 |
| Atf5          | -0.51296921  | 0.03661958 |
| Slc30a10      | -0.511017958 | 0.02477673 |
| Npr2          | -0.50555219  | 0.00136346 |
| Mug1          | -0.483934799 | 0.0310006  |
| Nr1i3         | -0.479277775 | 0.00357363 |
| Slc22a26      | -0.469542738 | 0.00907009 |
| Pctp          | -0.465655304 | 0.02652607 |
| Ecm1          | -0.461998128 | 0.00062414 |
| Trp53inp2     | -0.459689818 | 0.00451671 |
| B630019A10Rik | -0.448095994 | 0.0030178  |
| Clec14a       | -0.447772541 | 0.00203496 |
| Ahcy          | -0.444581618 | 0.02523487 |
| Robo4         | -0.443600247 | 0.02886335 |
| Helz2         | -0.43472191  | 0.02394316 |
| Slc45a3       | -0.430566464 | 0.00528726 |
| Cpox          | -0.4305041   | 0.01316421 |
| Tlr12         | -0.428695001 | 0.03333115 |
| Ehd3          | -0.427473534 | 0.00131446 |
| C8g           | -0.420463068 | 0.01223138 |
| Ldhd          | -0.419436236 | 0.02087604 |
| Hsd17b7       | -0.418758437 | 0.03411842 |
| Ugt3a2        | -0.414187529 | 0.00664446 |
| Sco2          | -0.413790188 | 0.04049568 |
| Gpr182        | -0.388748309 | 0.03659247 |
| Cyp3a25       | -0.385315588 | 0.03802341 |
| Sugct         | -0.379846147 | 0.04855581 |
| Slc27a5       | -0.363412498 | 0.04204381 |
| Dnaja1        | -0.362676294 | 0.03492279 |
| Cyp27a1       | -0.356522971 | 0.03379436 |
| Sec16b        | -0.355433782 | 0.01442269 |
| Gk            | -0.349271139 | 0.03532183 |
| Pbld1         | -0.338340944 | 0.02764691 |
| Calm2         | 0.303099366  | 0.04518639 |
| Micu2         | 0.323196223  | 0.04169538 |
| Rpl41         | 0.324806049  | 0.03649072 |
| Fam213a       | 0.325205251  | 0.0416672  |

|          |             |            |
|----------|-------------|------------|
| Rhoc     | 0.327247806 | 0.03967546 |
| Rpl23a   | 0.336237653 | 0.02996855 |
| Dnajc10  | 0.345847361 | 0.02752707 |
| Pea15a   | 0.355027285 | 0.04499126 |
| Rpsa     | 0.357048544 | 0.03245991 |
| Atpif1   | 0.358463937 | 0.0386905  |
| Ano10    | 0.363165653 | 0.04383826 |
| Cotl1    | 0.371283001 | 0.03173892 |
| Tgfbr2   | 0.37152455  | 0.02394316 |
| Hexb     | 0.371926355 | 0.02431281 |
| Rpl39    | 0.376670201 | 0.01518399 |
| Tmem184c | 0.378242316 | 0.04286346 |
| Bgn      | 0.383303991 | 0.03173892 |
| Actg1    | 0.390362387 | 0.04476841 |
| Tgfbi    | 0.392345456 | 0.04525693 |
| Mif      | 0.394534448 | 0.02799478 |
| Rpl35    | 0.399129642 | 0.00907009 |
| Akr1b3   | 0.403365793 | 0.03004037 |
| Sh3bgrl3 | 0.405421322 | 0.02288097 |
| Slc44a1  | 0.405473626 | 0.0102315  |
| Id2      | 0.406836092 | 0.02965315 |
| Nedd9    | 0.407533    | 0.04855581 |
| Gla      | 0.408945357 | 0.03359624 |
| Pcna     | 0.411141597 | 0.02800582 |
| Igfbp7   | 0.412077669 | 0.01201165 |
| Sort1    | 0.416421345 | 0.04855581 |
| Rpl12    | 0.417809947 | 0.0080091  |
| Mxra8    | 0.418387083 | 0.04624228 |
| Nans     | 0.418682426 | 0.0386905  |
| Rps24    | 0.420225676 | 0.01001117 |
| Alcam    | 0.422314793 | 0.01857861 |
| Tmem165  | 0.425291213 | 0.00861761 |
| Vim      | 0.425446822 | 0.00386232 |
| H1f0     | 0.425645684 | 0.03446501 |
| Tmem258  | 0.427467015 | 0.0151518  |
| Pdgfrb   | 0.430395591 | 0.04499126 |
| Fam84b   | 0.431694896 | 0.03302964 |
| Galns    | 0.433458873 | 0.01344263 |
| App      | 0.433666929 | 0.01488847 |
| Ide      | 0.440203253 | 0.04473631 |
| Me1      | 0.440636422 | 0.00697033 |
| Pdia6    | 0.44211682  | 0.00907009 |
| Il13ra1  | 0.442388186 | 0.00469064 |
| Anxa4    | 0.442517623 | 0.00264075 |
| Lgals1   | 0.443232755 | 0.02085783 |
| Tusc3    | 0.443379589 | 0.02899533 |
| Casc4    | 0.443567797 | 0.04855581 |
| Tpm4     | 0.444191681 | 0.003484   |
| Mcm3     | 0.445225306 | 0.03535646 |
| Cavin1   | 0.44858417  | 0.00992245 |
| Rhoq     | 0.44862332  | 0.01002801 |
| Cygb     | 0.452427758 | 0.02086239 |
| Zdhhc13  | 0.453078595 | 0.03002205 |
| Tm4sf1   | 0.453567447 | 0.00459169 |
| Gucy1a1  | 0.456649857 | 0.040944   |
| P3h3     | 0.460664115 | 0.04819971 |
| Ccdc80   | 0.464672392 | 0.00095304 |
| Steap2   | 0.470009794 | 0.01359171 |
| Pcolce   | 0.474659673 | 0.005641   |

|               |             |            |
|---------------|-------------|------------|
| Ptpre         | 0.475978307 | 0.04688097 |
| Csrp1         | 0.477722985 | 0.00045166 |
| Tagln2        | 0.480155327 | 0.00096638 |
| Cyp2c70       | 0.480159916 | 0.00552527 |
| Mfge8         | 0.48165736  | 0.04525693 |
| Wls           | 0.482239663 | 0.00198056 |
| Clec7a        | 0.482310917 | 0.02082631 |
| Angptl2       | 0.48527394  | 0.01967473 |
| Rab31         | 0.485518219 | 0.00514481 |
| Lbh           | 0.486806297 | 0.00044041 |
| Maged2        | 0.487411992 | 0.01706788 |
| Emp2          | 0.48993622  | 0.00052461 |
| Tmsb10        | 0.491543618 | 0.01201165 |
| Gas6          | 0.495237606 | 0.00992245 |
| Lpl           | 0.504996643 | 0.00478803 |
| Selenon       | 0.505128068 | 0.01059046 |
| F2r           | 0.505242861 | 0.00096638 |
| Ctnnal1       | 0.505712443 | 0.03503383 |
| Atp11a        | 0.506538313 | 0.03893556 |
| Rrm1          | 0.506825566 | 0.01201165 |
| Col6a1        | 0.506865972 | 0.01423344 |
| Tk1           | 0.509943294 | 0.03333115 |
| Ccdc88a       | 0.510252847 | 0.02369721 |
| Lsm8          | 0.511055121 | 0.0386905  |
| Gstm5         | 0.512475983 | 0.01347855 |
| Cfl2          | 0.513072214 | 0.0062945  |
| Lix1l         | 0.513533459 | 0.01335839 |
| Col6a2        | 0.516807326 | 0.00474248 |
| Hmgn2         | 0.517012011 | 0.00413965 |
| Pklr          | 0.519307196 | 0.02634805 |
| Col1a2        | 0.522534946 | 0.00090476 |
| Sfxn3         | 0.525539249 | 0.04901211 |
| Rnaseh2b      | 0.528172407 | 0.02670825 |
| S100a11       | 0.528727467 | 0.00520218 |
| Mgst3         | 0.533395292 | 0.01009495 |
| Gstp3         | 0.533433133 | 0.00151718 |
| Src           | 0.533507421 | 0.00737405 |
| Pdgfra        | 0.536129357 | 0.04121506 |
| Timp2         | 0.540237471 | 0.00413965 |
| Npdc1         | 0.542043535 | 0.00088295 |
| Mrc2          | 0.542267387 | 0.00925317 |
| Tceal9        | 0.543107026 | 0.0002572  |
| Dsg2          | 0.545324667 | 0.00011397 |
| Ehd2          | 0.545684181 | 0.00574336 |
| Arhgef16      | 0.549278189 | 0.01240361 |
| Fabp5         | 0.549280526 | 0.00457875 |
| Capn6         | 0.551156405 | 0.02036745 |
| Lhfp          | 0.551949005 | 0.00049787 |
| Pwwp2b        | 0.551993457 | 0.02446574 |
| Epb4111       | 0.552698942 | 0.02571451 |
| Zfp994        | 0.554604234 | 0.04965727 |
| Adamts2       | 0.555083377 | 0.00140256 |
| Rab3d         | 0.55544904  | 0.00088691 |
| Lat2          | 0.558327575 | 0.01359171 |
| Crip1         | 0.566073984 | 0.0001647  |
| Tspan3        | 0.568687224 | 0.00285821 |
| Pcdh7         | 0.569317658 | 0.02085585 |
| E330009J07Rik | 0.57138313  | 0.01937814 |
| Fam180a       | 0.573587427 | 0.03501295 |

|           |             |            |
|-----------|-------------|------------|
| Serpinb6a | 0.575466846 | 0.00000223 |
| Col1a1    | 0.575891662 | 0.00042716 |
| Anxa1     | 0.576155505 | 0.00022745 |
| Thbs2     | 0.576461912 | 0.00111222 |
| Pfkip     | 0.577612985 | 0.00182392 |
| Cbx6      | 0.581627839 | 0.01198356 |
| Hgf       | 0.582915885 | 0.00858763 |
| Slc25a4   | 0.58421     | 0.00019705 |
| Fchsd1    | 0.585151225 | 0.03736146 |
| Rasa2     | 0.58634715  | 0.03566867 |
| Gal3st1   | 0.586920092 | 0.02036745 |
| Cd9       | 0.588756299 | 0.0000217  |
| Cdk14     | 0.588829148 | 0.02333205 |
| Clstn1    | 0.593076754 | 0.03279563 |
| Cpne8     | 0.596350851 | 0.00584729 |
| Zfp984    | 0.5995669   | 0.03632344 |
| Timp3     | 0.600057488 | 0.00631866 |
| Epdr1     | 0.602170359 | 0.00916021 |
| Efemp2    | 0.606059497 | 0.00218287 |
| Chmp4c    | 0.608698736 | 0.00357363 |
| Abcb1a    | 0.609553319 | 0.01925579 |
| Pkia      | 0.610896645 | 0.03320513 |
| Emb       | 0.611915727 | 0.00907009 |
| Ptgr1     | 0.612859138 | 0.00068779 |
| Sgce      | 0.615558598 | 0.00872603 |
| Svep1     | 0.615787388 | 0.01201165 |
| Lepr      | 0.615873714 | 0.00072498 |
| Setdb2    | 0.616742301 | 0.04044698 |
| Pamr1     | 0.617912413 | 0.00634426 |
| Serpinh1  | 0.618491392 | 0.0000992  |
| Dkk3      | 0.623285974 | 0.00598313 |
| Ano1      | 0.623845147 | 0.03204659 |
| Fads3     | 0.625398378 | 0.04819971 |
| Sparc     | 0.626540846 | 0.00000197 |
| Gdf6      | 0.627103456 | 0.01201165 |
| Slpi      | 0.627588385 | 0.00584729 |
| Rcan3     | 0.628362965 | 0.00653898 |
| Ppic      | 0.630020892 | 0.00151718 |
| Golm1     | 0.630620364 | 0.00026824 |
| Lynx1     | 0.631080953 | 0.02153588 |
| Rragd     | 0.632881596 | 0.00060919 |
| Smoc2     | 0.634843098 | 0.00018558 |
| Gpr153    | 0.638359527 | 0.03963197 |
| Jag1      | 0.638376573 | 0.00864454 |
| Unc5b     | 0.638629645 | 0.04855581 |
| Itih5     | 0.640171347 | 0.00069053 |
| Olfml3    | 0.641578447 | 0.00000481 |
| 6-Sep     | 0.644403422 | 0.02749977 |
| Evc       | 0.645951974 | 0.00059451 |
| Cd276     | 0.656029733 | 0.00030628 |
| Mmgt2     | 0.659052775 | 0.02649821 |
| Rbp1      | 0.66199853  | 0.00000495 |
| Mxra7     | 0.66224968  | 0.00237728 |
| Ltbp3     | 0.663835917 | 0.00487092 |
| lkbip     | 0.666298587 | 0.00096527 |
| Itga8     | 0.666453056 | 0.0000109  |
| Fbn1      | 0.667204009 | 0.00101182 |
| Art4      | 0.66797043  | 0.00090476 |
| Col3a1    | 0.668857606 | 0.00000225 |

|           |             |            |
|-----------|-------------|------------|
| Lox       | 0.669902694 | 0.00106801 |
| Cystm1    | 0.675055975 | 0.00096638 |
| Pygb      | 0.677469448 | 0.00012827 |
| Wnt5a     | 0.678623649 | 0.02421399 |
| Gabbr2    | 0.679028828 | 0.0000285  |
| Kcnn4     | 0.679674254 | 0.02584275 |
| Antxr1    | 0.680869402 | 0.00255471 |
| Bambi     | 0.681221877 | 0.00362938 |
| Cx3cl1    | 0.681383443 | 0.00413965 |
| Aph1b     | 0.684515327 | 0.02780622 |
| Cacna2d1  | 0.684883055 | 0.03245563 |
| Nrep      | 0.68579179  | 0.00864236 |
| Vsig10    | 0.685871054 | 0.02571451 |
| Mbp       | 0.687748316 | 0.02036745 |
| Cxcl14    | 0.695779618 | 0.00278068 |
| Ptgis     | 0.69745922  | 0.04855581 |
| B4galt6   | 0.700383594 | 0.00831875 |
| Prss8     | 0.704492132 | 0.01344263 |
| Ift57     | 0.708516027 | 0.03316903 |
| Loxl1     | 0.708649706 | 0.00101345 |
| Aebp1     | 0.711686134 | 0.00045495 |
| Gmnn      | 0.712971221 | 0.0017356  |
| Mcm6      | 0.714652717 | 0.00059887 |
| Rab11fip5 | 0.714930667 | 0.00346126 |
| Slc44a3   | 0.714977838 | 0.0000274  |
| Col5a2    | 0.715502654 | 3.75E-08   |
| C1qtnf6   | 0.722081933 | 0.00236146 |
| Ptgfrn    | 0.72265592  | 0.0000675  |
| Mansc1    | 0.726373586 | 0.02764691 |
| Syng1     | 0.727471179 | 0.02799478 |
| Tagln     | 0.728471996 | 0.0000318  |
| Socs2     | 0.728912113 | 0.02649821 |
| Miga1     | 0.730446102 | 0.00357593 |
| Hr        | 0.731635627 | 0.00042307 |
| Mt1       | 0.734973802 | 0.0110319  |
| Mlph      | 0.73566786  | 0.04499126 |
| Dpt       | 0.738369494 | 0.0000627  |
| S100a6    | 0.740725488 | 0.00824781 |
| Anxa9     | 0.742451443 | 0.0376566  |
| Hid1      | 0.742976549 | 0.02465743 |
| Ak1       | 0.745330924 | 0.03980211 |
| Srebf1    | 0.749692666 | 0.000024   |
| Ctsk      | 0.753528716 | 0.00030839 |
| Evc2      | 0.754049579 | 0.00357593 |
| Pard3b    | 0.754509083 | 0.04098599 |
| Ezr       | 0.760586126 | 0.00000467 |
| Ptk7      | 0.770821726 | 0.01804838 |
| Nrm       | 0.775036782 | 0.02525084 |
| Acta2     | 0.777714681 | 0.00545015 |
| Gipc2     | 0.778074716 | 0.0000869  |
| Cav2      | 0.778417874 | 0.00000134 |
| Gramd1b   | 0.779986638 | 0.0151518  |
| Cdh1      | 0.780281725 | 3.44E-10   |
| Lrrc8b    | 0.780340334 | 0.00413965 |
| Lum       | 0.780735398 | 2.24E-10   |
| Htra1     | 0.780772748 | 0.00013331 |
| Spon1     | 0.78530778  | 0.02036745 |
| C1qtnf2   | 0.789542418 | 0.02488542 |
| Tes       | 0.794251833 | 0.00043197 |

|          |             |            |
|----------|-------------|------------|
| Fkbp10   | 0.795051987 | 0.00083389 |
| Mmp2     | 0.795537707 | 0.00021329 |
| Lama2    | 0.796898066 | 0.00037706 |
| Pmepa1   | 0.798792057 | 0.0000247  |
| Veph1    | 0.799558455 | 0.04691612 |
| Adam11   | 0.799944591 | 0.00913164 |
| Rad18    | 0.808305459 | 0.00554529 |
| Scd2     | 0.811506486 | 0.0000108  |
| Ddit4l   | 0.813902129 | 0.00040921 |
| Robo2    | 0.814467089 | 0.00012978 |
| Scube1   | 0.816117608 | 0.00026824 |
| Cd63     | 0.819482631 | 4.19E-08   |
| Fgfr3    | 0.821552427 | 0.0040951  |
| Slc25a24 | 0.821757216 | 6.92E-07   |
| Itgbl1   | 0.824629349 | 0.01661827 |
| Ccr1     | 0.829041271 | 0.00218287 |
| Ncaph    | 0.830360783 | 0.04090204 |
| Rap1gap  | 0.83835212  | 0.0371384  |
| Mt2      | 0.8388879   | 0.01168434 |
| Pkp3     | 0.846059042 | 0.02884654 |
| Ednrb    | 0.847075202 | 0.0001018  |
| Ddr1     | 0.851572907 | 0.0000807  |
| Palm     | 0.852034964 | 0.00039488 |
| Al467606 | 0.852916686 | 0.02229271 |
| Fmod     | 0.853332466 | 0.0000217  |
| Col15a1  | 0.856210231 | 0.00059451 |
| Tgfb2    | 0.86518881  | 0.00648123 |
| Thsd7a   | 0.86758536  | 0.02714046 |
| Tuba1a   | 0.867983854 | 0.00474401 |
| Pygo1    | 0.870007349 | 0.04487325 |
| Adamts11 | 0.874146635 | 0.00256609 |
| Emp1     | 0.8764806   | 8.38E-10   |
| Adamts9  | 0.881142739 | 0.00086365 |
| Fgf12    | 0.884669954 | 0.02563745 |
| Nucb2    | 0.89199933  | 0.00000223 |
| Pkhd1    | 0.894425589 | 0.00000267 |
| Zc2hc1a  | 0.909571301 | 0.0000544  |
| Srd5a2   | 0.914593017 | 0.01672579 |
| Cav1     | 0.915755671 | 0.00128143 |
| Crispld2 | 0.917327197 | 0.00049686 |
| Ncam1    | 0.918526471 | 0.04459267 |
| Ppp1r1b  | 0.918587203 | 0.00026824 |
| Fstl1    | 0.925585443 | 2.13E-10   |
| Tmem119  | 0.930690712 | 0.00103581 |
| Ace      | 0.934572821 | 0.00081443 |
| Prkar2b  | 0.938910417 | 0.00155063 |
| Pdgfd    | 0.940944267 | 0.00042099 |
| Clmp     | 0.94286194  | 0.0000147  |
| Bex3     | 0.945237135 | 0.00020266 |
| Prrx1    | 0.950414399 | 0.02744946 |
| St14     | 0.95452256  | 0.00172428 |
| Thbs3    | 0.957632564 | 0.02884654 |
| Usp43    | 0.957903474 | 0.03411842 |
| Oscp1    | 0.963222144 | 0.04197937 |
| Kcnq1    | 0.96494077  | 0.01097286 |
| Adgrg1   | 0.984712944 | 0.00014001 |
| Cand2    | 0.989070269 | 0.02336875 |
| Cyp2a4   | 0.997319072 | 9.43E-07   |
| Ubtd2    | 0.998153057 | 0.01073128 |

|          |             |            |
|----------|-------------|------------|
| Sox9     | 1.007701843 | 8.83E-07   |
| Myl9     | 1.011070399 | 0.00041273 |
| Kdelr3   | 1.014007649 | 0.00244045 |
| Gpm6a    | 1.014354877 | 0.00011201 |
| Fam13c   | 1.017137256 | 0.00945751 |
| Col8a1   | 1.017621261 | 0.0000688  |
| Dclk1    | 1.022476751 | 0.0427851  |
| Gprc5b   | 1.026435407 | 0.00126612 |
| Sox4     | 1.029300748 | 3.44E-10   |
| Tmem132a | 1.034560723 | 0.0060152  |
| Sparcl1  | 1.039241994 | 0.0000271  |
| Plat     | 1.042495022 | 4.95E-09   |
| Tspan6   | 1.043072072 | 0.00913164 |
| 9-Mar    | 1.04565962  | 0.03083174 |
| Dync2li1 | 1.057597652 | 0.00043614 |
| Tmc4     | 1.062606375 | 0.01201165 |
| Arhgap44 | 1.062865212 | 0.00059461 |
| Thsd4    | 1.06534039  | 0.03106315 |
| Hells    | 1.069641252 | 0.00650198 |
| Rasal1   | 1.072230617 | 0.00097435 |
| Col6a3   | 1.072777584 | 3.66E-09   |
| Pdgfrl   | 1.07423     | 0.00155063 |
| Kif1a    | 1.074359415 | 0.00551032 |
| Lgi2     | 1.081647781 | 0.02523487 |
| Cxcl5    | 1.086321018 | 0.04945175 |
| Cd34     | 1.087684094 | 1.24E-09   |
| Triqk    | 1.095410989 | 0.02366938 |
| Lama5    | 1.102964718 | 0.00609067 |
| Bicc1    | 1.114798626 | 9.01E-08   |
| Nek5     | 1.117147636 | 0.01809341 |
| Pi15     | 1.118268804 | 0.00642351 |
| Pik3ip1  | 1.123119868 | 0.02165758 |
| Mtcl1    | 1.132500125 | 0.01804838 |
| Col4a5   | 1.143249109 | 0.0000349  |
| Zdhhc15  | 1.144873341 | 0.02563745 |
| Enah     | 1.14600626  | 0.00070485 |
| Sphk1    | 1.146636542 | 0.02036745 |
| Ltbp2    | 1.152698711 | 0.00000323 |
| Rab27b   | 1.157123682 | 0.00000303 |
| Itga6    | 1.157504387 | 6.97E-09   |
| Misp     | 1.16426802  | 0.00354675 |
| Fxyd6    | 1.175837095 | 0.01073268 |
| Itga2    | 1.177666504 | 0.00455174 |
| Lrrc49   | 1.178367953 | 0.00244021 |
| Lamc3    | 1.179653276 | 0.00072498 |
| Tesc     | 1.185733006 | 0.01560749 |
| Pak6     | 1.198328876 | 0.01043862 |
| Fstl3    | 1.198964805 | 0.00255144 |
| Cldn6    | 1.200318172 | 0.00341659 |
| Tcf24    | 1.202878207 | 0.01711042 |
| Col4a4   | 1.208004483 | 0.00155063 |
| Hao2     | 1.211034931 | 0.00141115 |
| Eln      | 1.214731801 | 0.00033526 |
| Megf6    | 1.218929331 | 0.02367183 |
| Ptpn13   | 1.219276015 | 0.0000937  |
| Kcnab1   | 1.226560299 | 0.00042307 |
| Hebp2    | 1.233065835 | 0.00223682 |
| F2rl1    | 1.239931572 | 0.00348129 |
| Itgb8    | 1.250862687 | 0.0000627  |



|               |             |            |
|---------------|-------------|------------|
| BC055324      | 1.259846867 | 0.00980527 |
| Scn8a         | 1.265021556 | 0.00122063 |
| Gm15883       | 1.272883751 | 0.00706073 |
| Syt7          | 1.278672464 | 0.00032919 |
| Igsf9         | 1.280194987 | 0.02167135 |
| Nipal2        | 1.281152071 | 0.00147497 |
| Mdk           | 1.281205543 | 0.00096527 |
| Sema3c        | 1.285332802 | 0.00047713 |
| Prr15l        | 1.293787837 | 0.0000443  |
| Pdpn          | 1.305479626 | 0.01967473 |
| Sobp          | 1.306228936 | 0.01240361 |
| Nebl          | 1.31531688  | 0.0285184  |
| Serpine2      | 1.316055998 | 7.08E-13   |
| Asns          | 1.320229939 | 0.00357363 |
| Tinag         | 1.321050002 | 0.00916021 |
| 5330417C22Rik | 1.325677653 | 0.0000169  |
| Kif12         | 1.326446635 | 0.01163632 |
| Map1b         | 1.330432087 | 0.0041819  |
| Itgb4         | 1.333465785 | 0.00063758 |
| Tmem229a      | 1.335050105 | 0.00010054 |
| Slc12a8       | 1.355924052 | 0.00258496 |
| Ildr1         | 1.361699704 | 0.00423844 |
| Spint1        | 1.370288343 | 0.00026824 |
| Sema5a        | 1.371027428 | 0.0000102  |
| Slain1        | 1.377020416 | 0.02036745 |
| Slc5a1        | 1.393632101 | 6.71E-07   |
| Gldn          | 1.397908763 | 0.00413965 |
| Dcdc2a        | 1.404304452 | 3.44E-10   |
| 9530077C05Rik | 1.418750434 | 0.00322289 |
| Grhl2         | 1.422091281 | 0.00248949 |
| Trim16        | 1.432183112 | 0.00451671 |
| Chrb1         | 1.439060018 | 0.0000132  |
| Tmem45a       | 1.44076044  | 5.28E-07   |
| Rassf9        | 1.462391957 | 0.0000777  |
| Rab25         | 1.469015798 | 0.00433488 |
| Fjx1          | 1.472002201 | 0.00348129 |
| Glis3         | 1.475921003 | 0.0000321  |
| Mboat1        | 1.48091511  | 0.00021656 |
| Klf5          | 1.521299272 | 0.00036725 |
| Egflam        | 1.528632001 | 6.86E-07   |
| Pdzk1ip1      | 1.536509339 | 1.61E-07   |
| Hkdc1         | 1.545737494 | 0.00082985 |
| Krt7          | 1.55432176  | 0.0000688  |
| Gm830         | 1.565268718 | 0.00016061 |
| Cd24a         | 1.565408494 | 2.35E-16   |
| Kcne3         | 1.569730864 | 2.44E-07   |
| Capsl         | 1.575461257 | 0.00013488 |
| Muc1          | 1.576259992 | 1.90E-08   |
| Hs6st2        | 1.608134048 | 0.00053962 |
| Plet1         | 1.62244063  | 4.80E-08   |
| Krt19         | 1.644008395 | 1.23E-07   |
| Fermt1        | 1.657489266 | 1.23E-07   |
| ccdc198       | 1.667640709 | 0.00000148 |
| Wfdc3         | 1.669497331 | 0.00735172 |
| Spp1          | 1.670448745 | 6.30E-29   |
| Ankrd1        | 1.672624108 | 8.72E-09   |
| Mal           | 1.674377147 | 0.0000295  |
| Kcnk1         | 1.676677323 | 6.92E-07   |
| Fxyd3         | 1.687746778 | 0.00000563 |

|               |             |            |
|---------------|-------------|------------|
| Olfml2a       | 1.704512433 | 0.0000108  |
| Ugt8a         | 1.711740683 | 0.00014819 |
| Lrrc8e        | 1.716968796 | 0.00026824 |
| Cldn4         | 1.758210418 | 0.00011201 |
| Il17re        | 1.771835573 | 0.00096638 |
| Ctnnd2        | 1.789477309 | 0.00144454 |
| Epb41l4a      | 1.79396982  | 0.00022491 |
| Cnksr1        | 1.795656546 | 0.00384751 |
| Lamc2         | 1.796452122 | 2.45E-07   |
| Scara3        | 1.799889784 | 6.36E-17   |
| Anxa13        | 1.800903054 | 5.72E-09   |
| Meox1         | 1.805650256 | 0.00010411 |
| Epn3          | 1.806247073 | 0.00038654 |
| Cldn8         | 1.806339358 | 0.0000076  |
| Ifnlr1        | 1.824506778 | 0.00013492 |
| Klc3          | 1.848589853 | 0.000072   |
| Bdkrb2        | 1.849005037 | 0.0000634  |
| Wnk2          | 1.851455881 | 0.00060276 |
| Epcam         | 1.875235504 | 2.75E-19   |
| Cldn7         | 1.879296028 | 3.73E-07   |
| Sult2a6       | 1.895914451 | 0.00123231 |
| H19           | 1.907748068 | 4.85E-12   |
| Wfdc15b       | 1.92347091  | 0.00000302 |
| Myo5c         | 1.926991526 | 0.00018985 |
| Slc44a4       | 1.930814069 | 0.0000355  |
| Shisa4        | 1.941947289 | 0.0000244  |
| Cftr          | 1.967147712 | 3.88E-07   |
| Ehf           | 2.017484202 | 3.70E-19   |
| Cdh6          | 2.031041565 | 1.55E-10   |
| Scube3        | 2.037145783 | 1.02E-07   |
| Fbn2          | 2.039281905 | 7.75E-09   |
| Sult2a2       | 2.047271073 | 0.00000145 |
| Prom1         | 2.059495584 | 4.53E-31   |
| Tnnt2         | 2.070277287 | 0.02652607 |
| Sult2a5       | 2.07049372  | 0.00047225 |
| Bspry         | 2.113762972 | 0.00000379 |
| Itgb6         | 2.117746711 | 0.0000725  |
| Esrp1         | 2.120114839 | 0.00010054 |
| Kcnma1        | 2.130260114 | 0.00011879 |
| Tspan8        | 2.27466046  | 4.53E-31   |
| A230001M10Rik | 2.392716921 | 5.83E-09   |
| Sftpd         | 2.401616904 | 4.00E-16   |
| Sult2a1       | 2.485983508 | 0.0000845  |
| Lrrc55        | 2.628536499 | 3.24E-09   |
| Akr1c18       | 2.641839438 | 3.82E-12   |
| Scd1          | 2.762129356 | 4.18E-10   |
| Sgpp2         | 2.76435943  | 0.00000522 |
| Mmp7          | 2.87460629  | 1.37E-08   |
| Clic6         | 3.105384173 | 3.43E-07   |
