# Supplementary figures and images for: Loss of hepatic Mboat7 leads to liver fibrosis
Source: PubMed Central journal article supplement — Gut. 2020 Jun 26;70(5):940–50. doi: 10.1136/gutjnl-2020-320853 (PMC8040158; doi:10.1136/gutjnl-2020-320853), 2020-06-26

**A**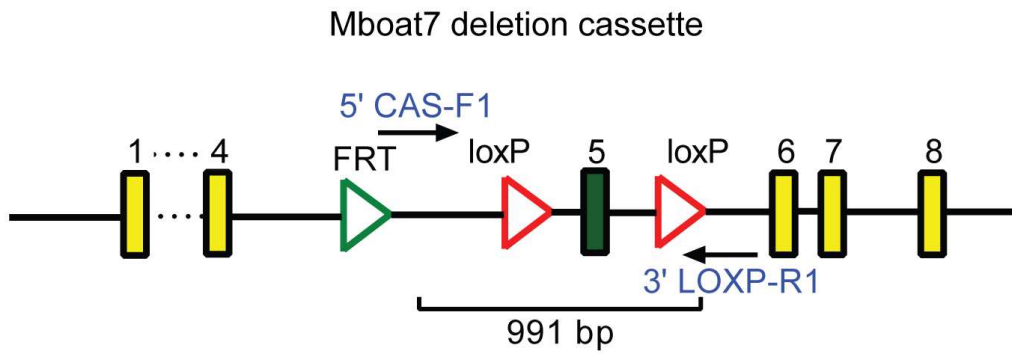**B**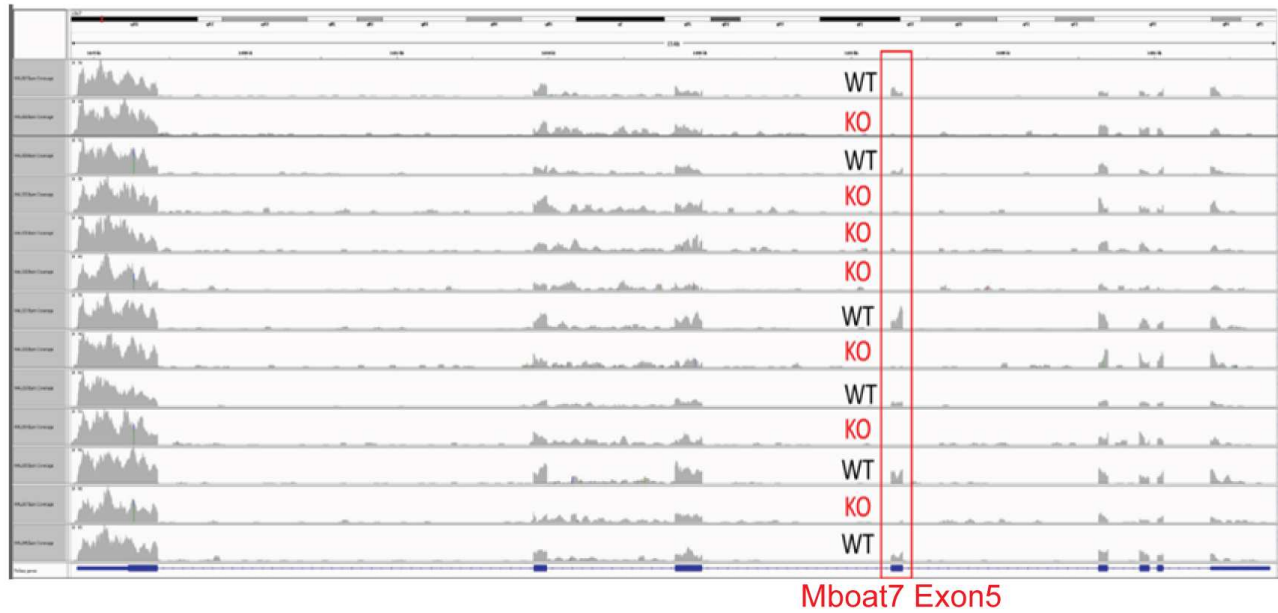**C**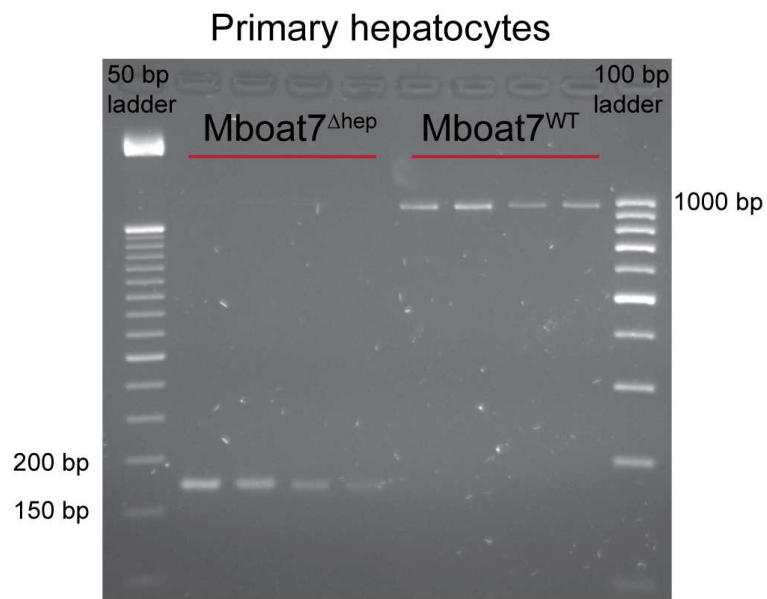

Supplement: gutjnl-2020-320853supp003.pdf [file gutjnl-2020-320853supp003.pdf]

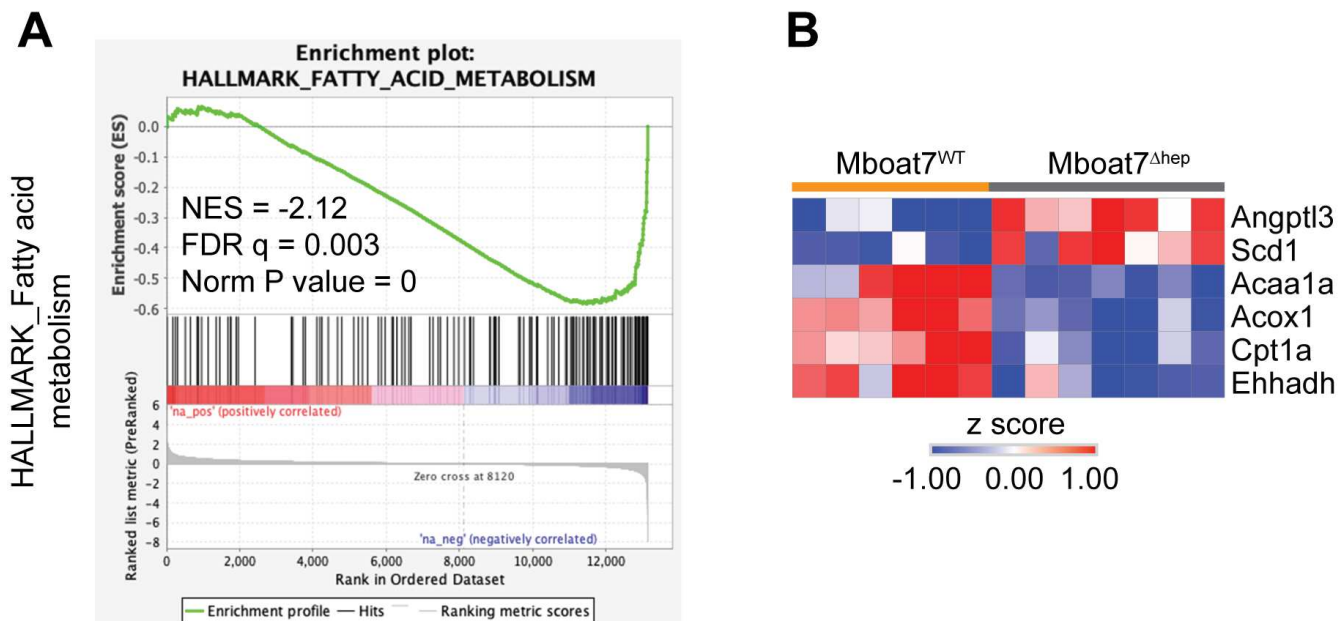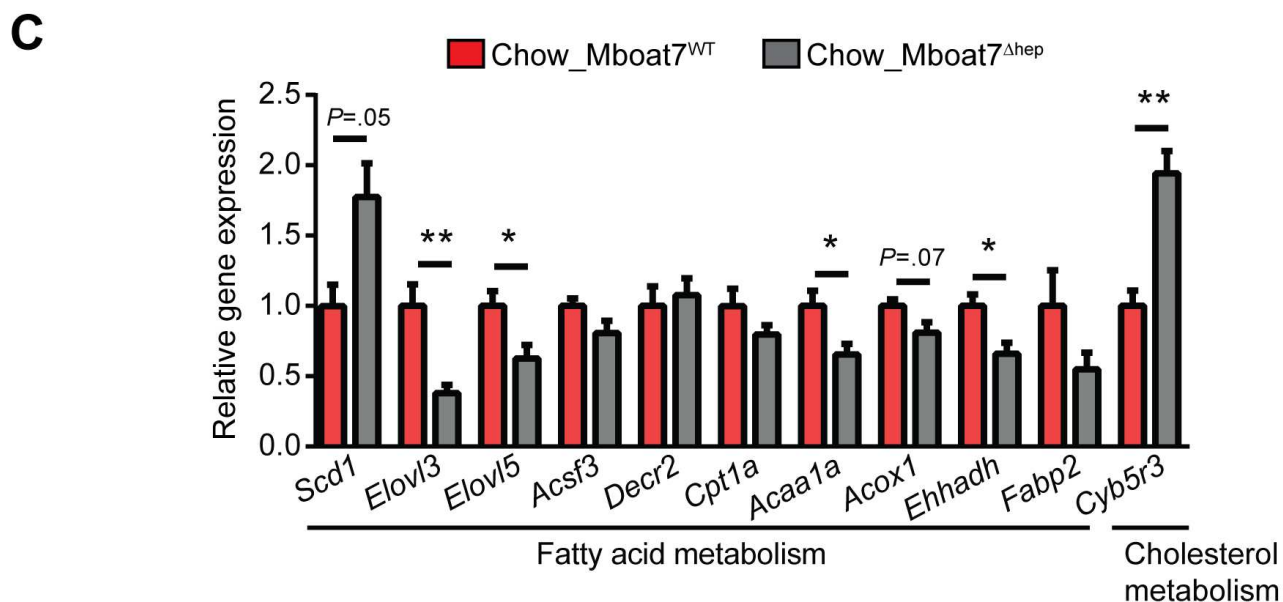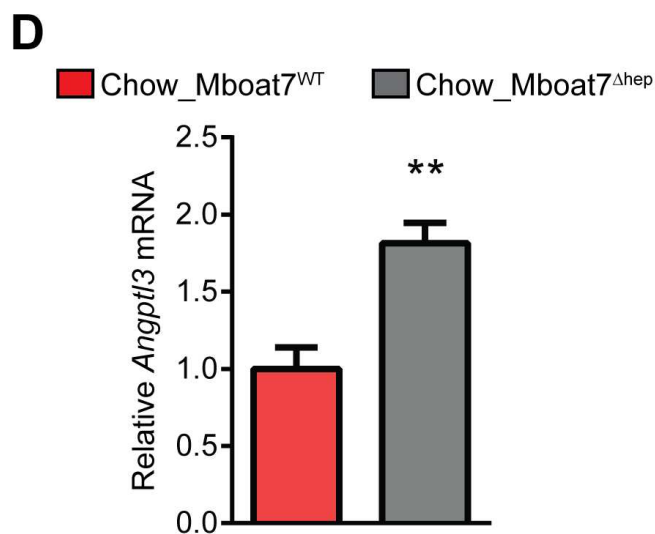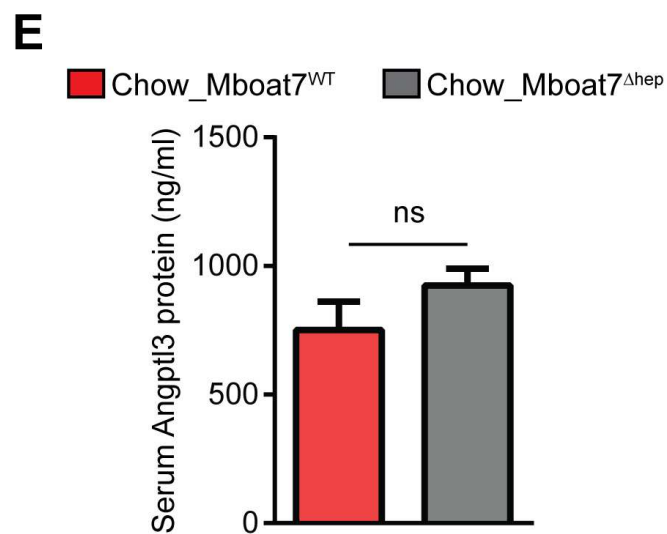

Supplement: gutjnl-2020-320853supp005.pdf [file gutjnl-2020-320853supp005.pdf]

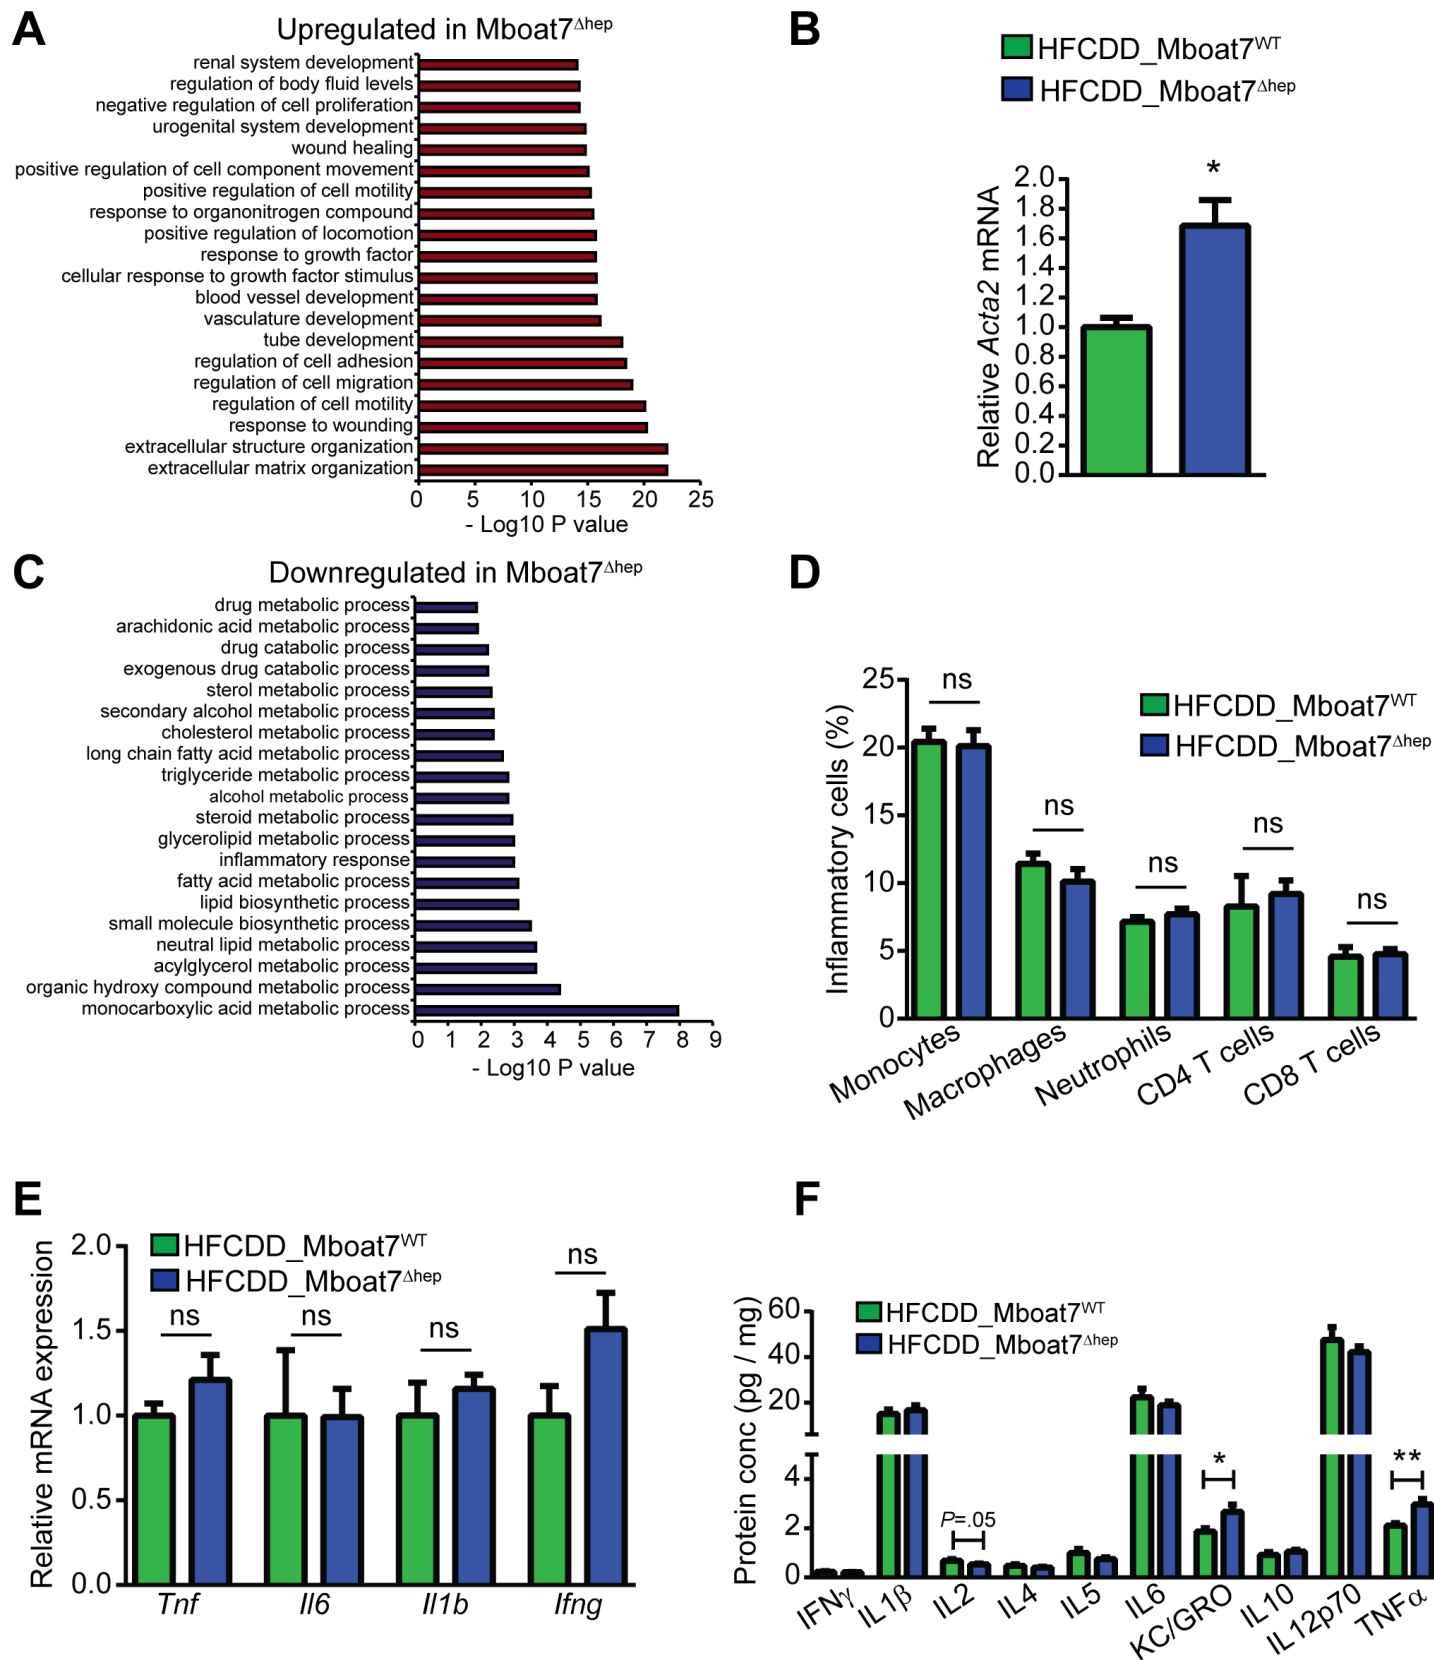

Supplement: gutjnl-2020-320853supp009.pdf [file gutjnl-2020-320853supp009.pdf]

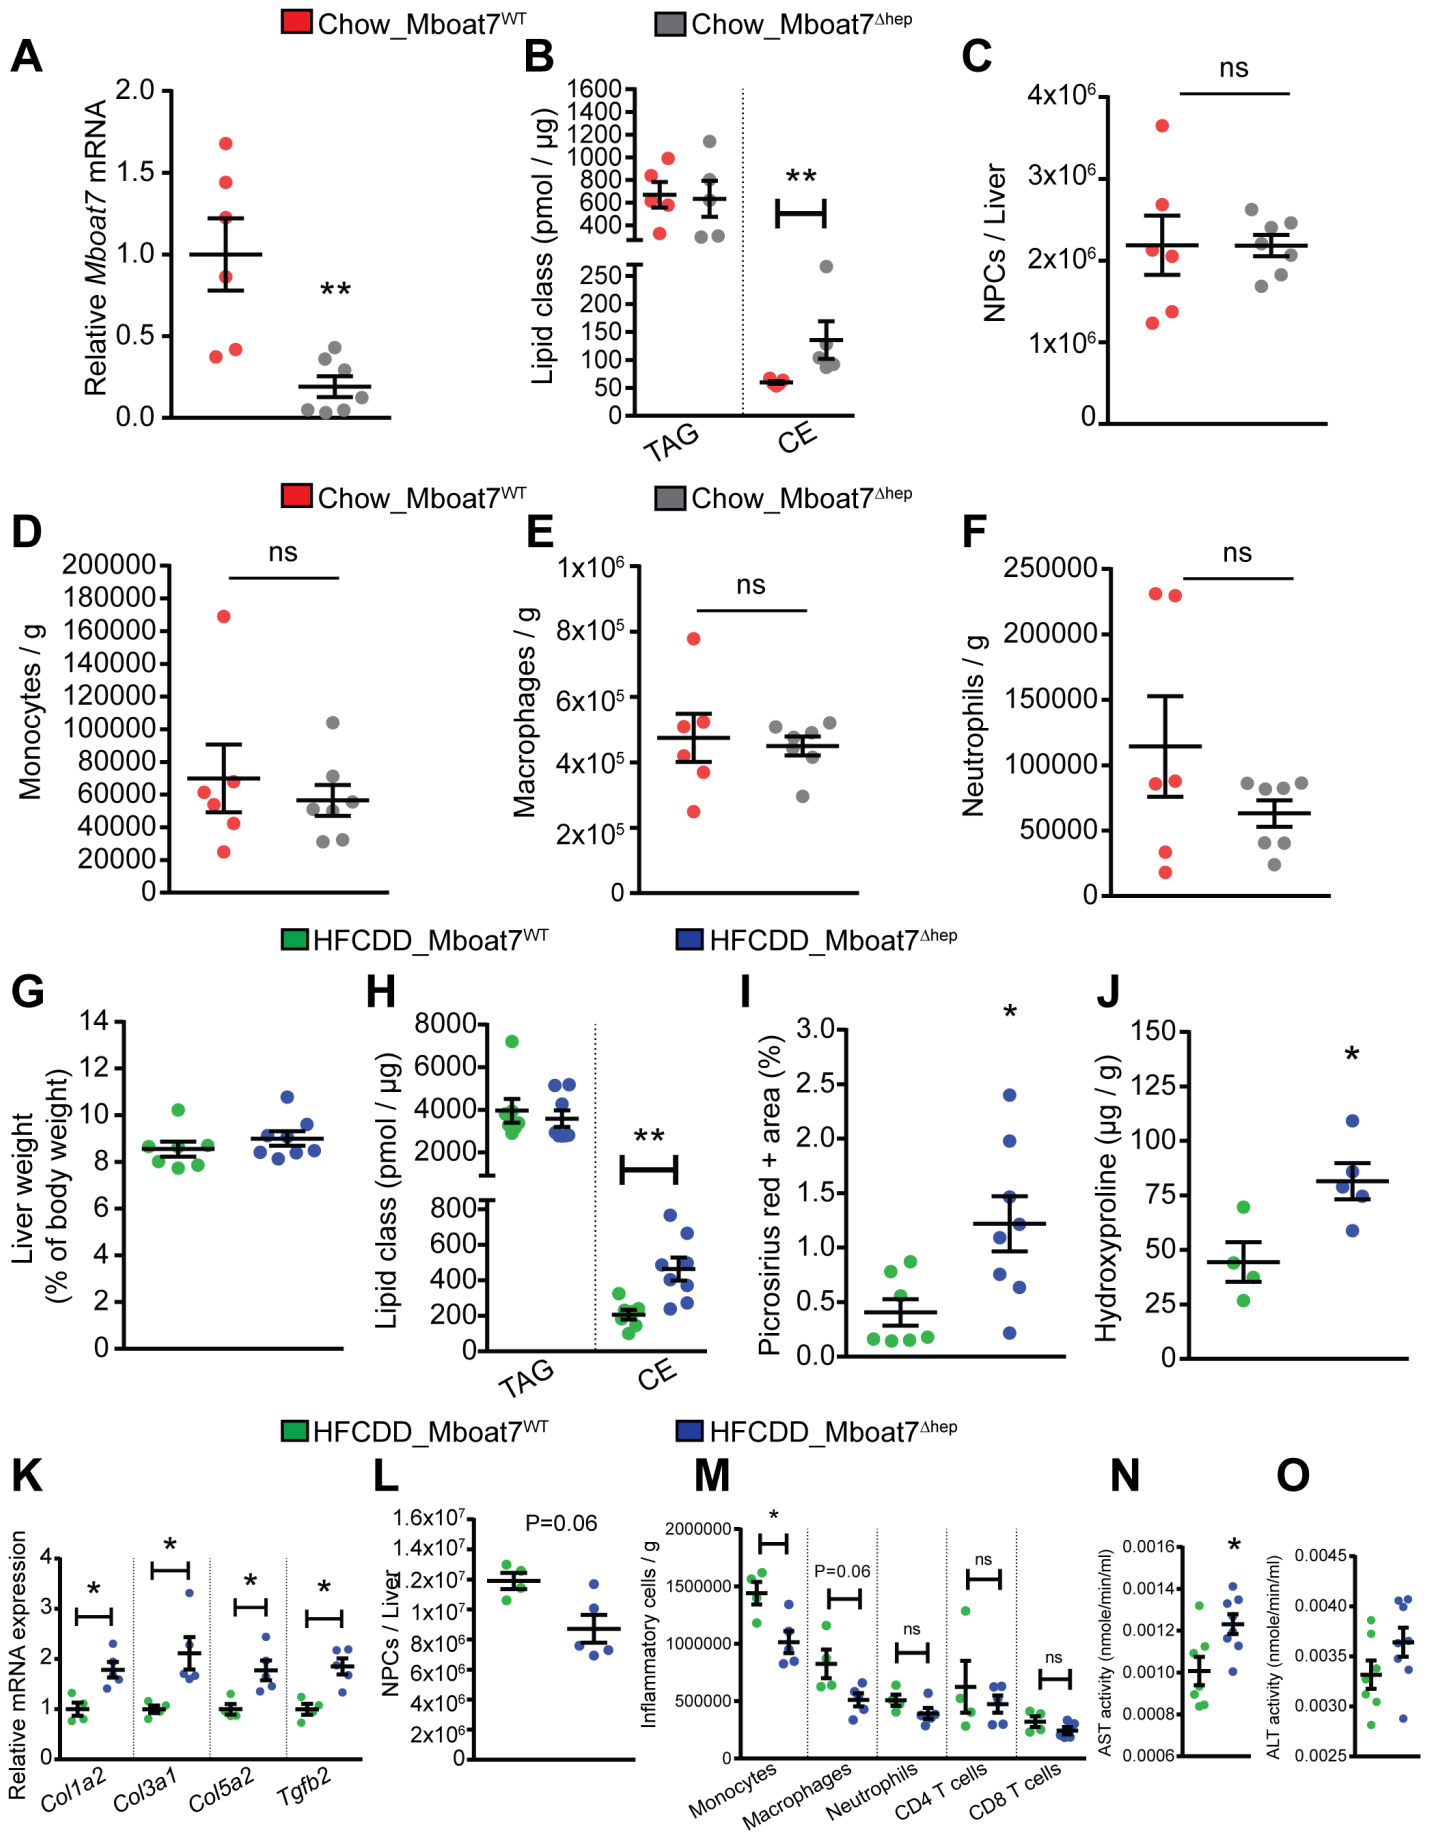

Supplement: gutjnl-2020-320853supp017.pdf [file gutjnl-2020-320853supp017.pdf]

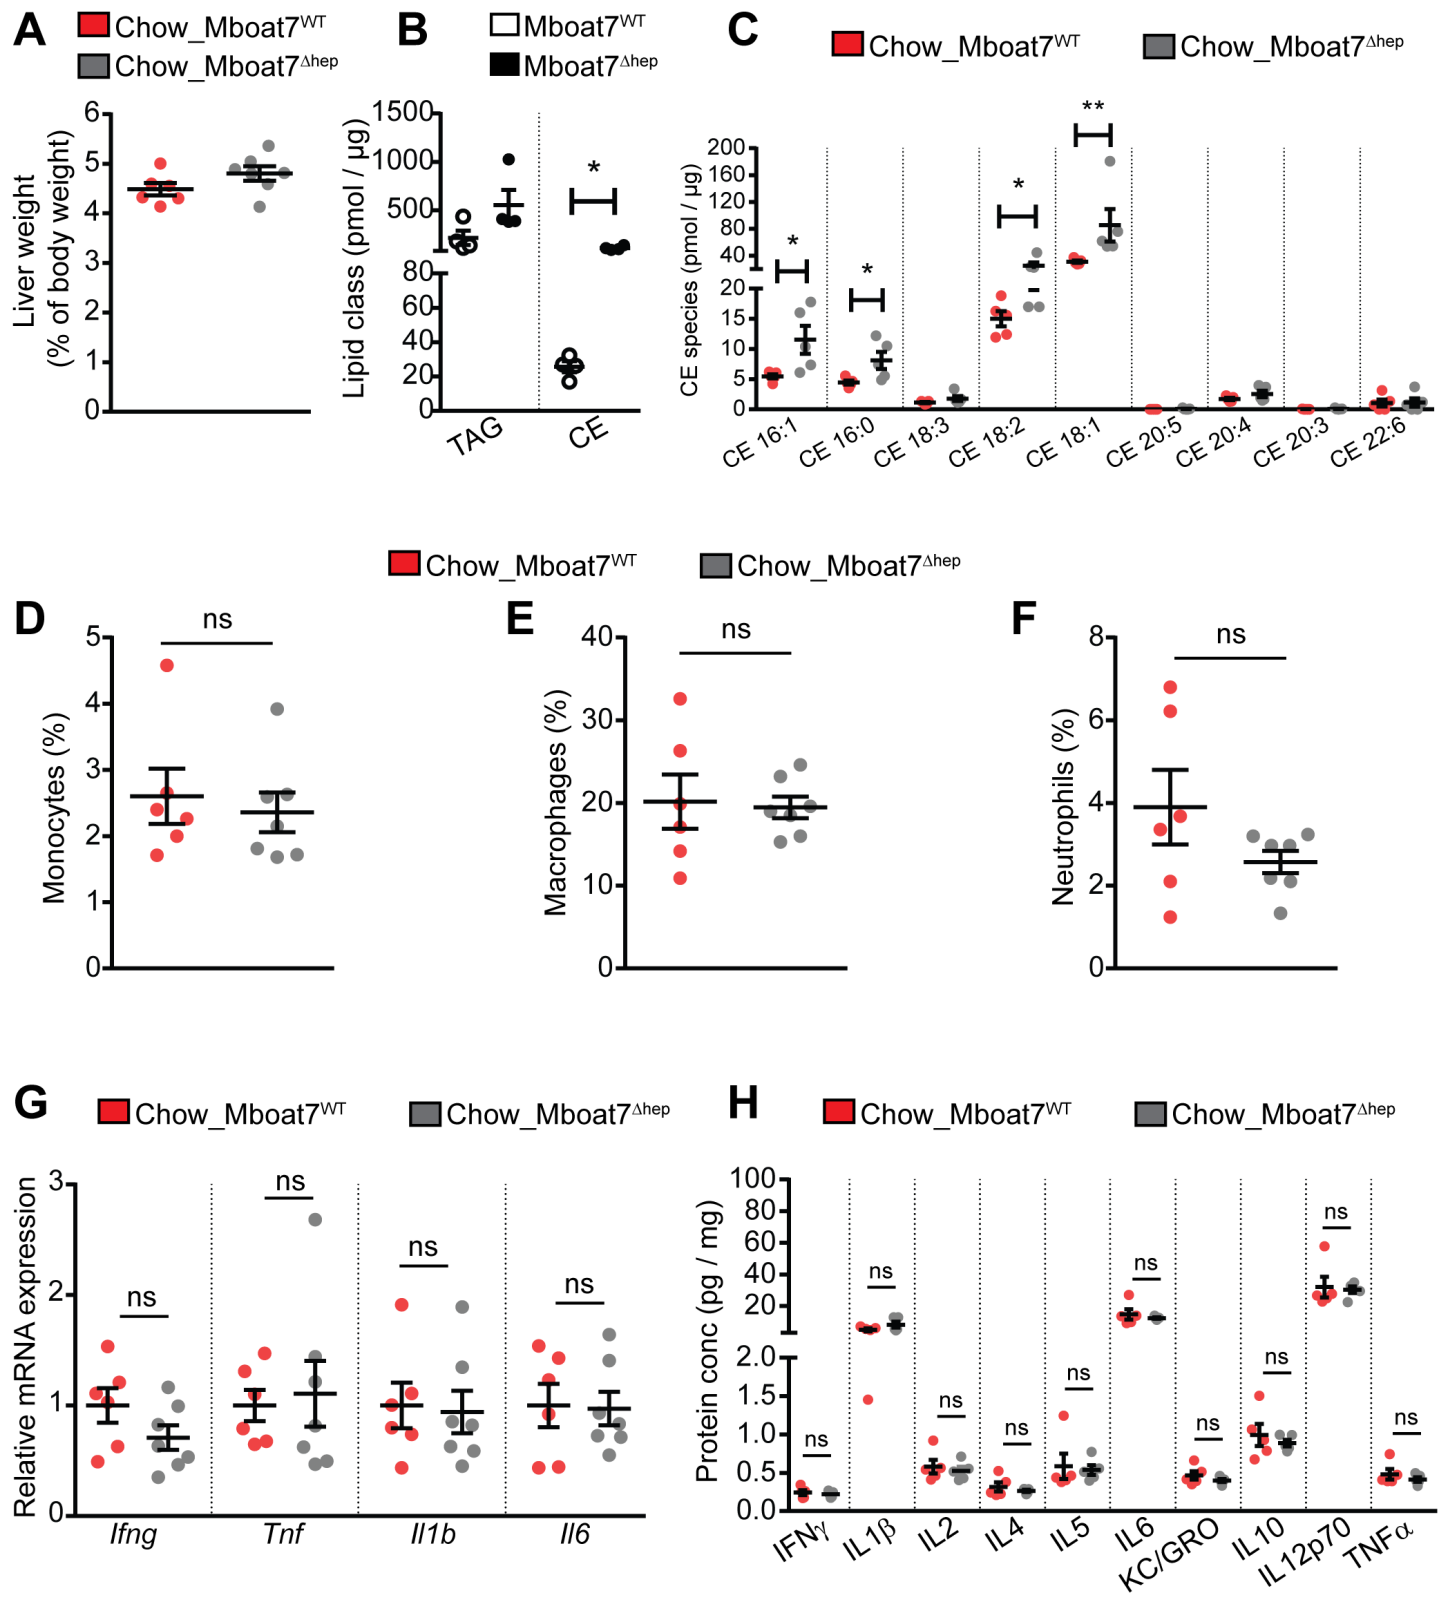

Supplement: gutjnl-2020-320853supp020.pdf [file gutjnl-2020-320853supp020.pdf]

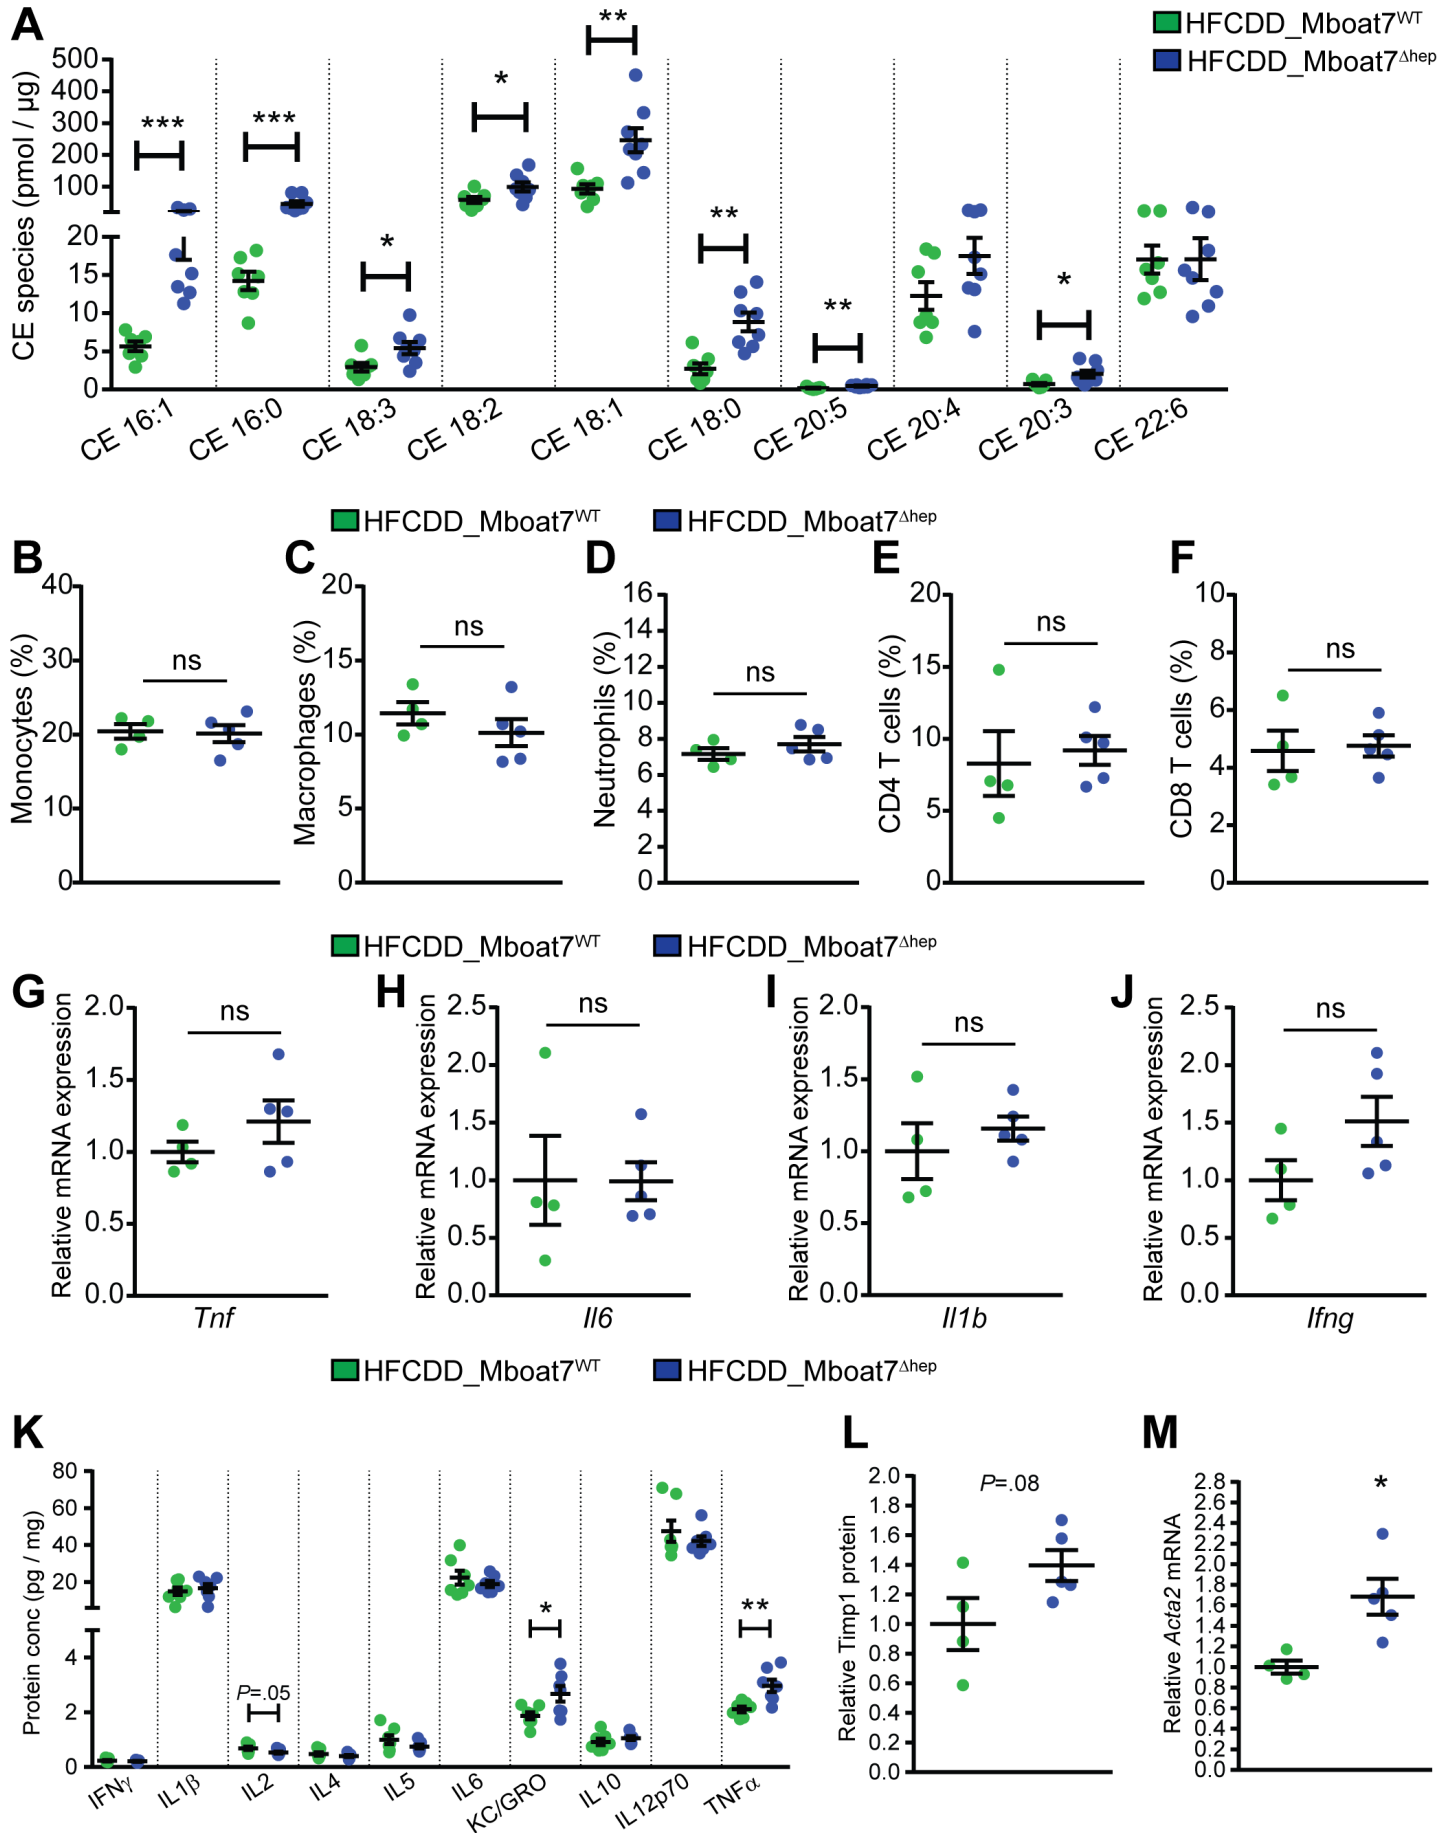

Supplement: gutjnl-2020-320853supp022.pdf [file gutjnl-2020-320853supp022.pdf]
